# 1 Evolution and manipulation of vector host choice

2 Sylvain Gandon

3 CEFE UMR 5175, CNRS - Université de Montpellier - Université Paul-Valéry Montpellier - EPHE

4 1919 route de Mende, 34293 Montpellier, France

## 5 **Abstract:**

6 **The transmission of many animal and plant diseases relies on the behavior of arthropod vectors. In**  
7 **particular, the choice to feed on either infected or uninfected hosts can dramatically affect the**  
8 **epidemiology of vector-borne diseases. I develop an epidemiological model to explore the impact**  
9 **of host choice behavior on the dynamics of these diseases and to examine selection acting on**  
10 **vector behavior, but also on pathogen manipulation of this behavior. This model identifies multiple**  
11 **evolutionary conflicts over the control of this behavior and generates testable predictions under**  
12 **different scenarios. In general, the vector should evolve the ability to avoid infected hosts.**  
13 **However, if the vector behavior is under the control of the pathogen, uninfected vectors should**  
14 **prefer infected hosts while infected vectors should seek uninfected hosts. Some mechanistic**  
15 **constraints on pathogen manipulation ability may, however, alter these predictions. These**  
16 **theoretical results are discussed in the light of observed behavioral patterns obtained on a diverse**  
17 **range of vector-borne diseases. These patterns confirm that many pathogens have evolved**  
18 **complex behavioral manipulation strategies of their vector species. Contrasting the behavior of**  
19 **infected and uninfected vectors may help to reveal mechanistic constraints acting on the**  
20 **manipulation of vector behavior.**

21 **Keywords:** vector borne disease, host choice, parasitic manipulation, mosquito behavior, malaria,  
22 virus.

23

## 24 1. Introduction

25 Many animal and plant infectious diseases are transmitted by arthropod vectors. In humans, several  
26 deadly vector-borne diseases (e.g. malaria, yellow fever, dengue, West Nile virus) are transmitted by  
27 mosquitoes or by other insect species (sandflies, fleas, ticks, tsetse flies). In plants, numerous other  
28 vector species (e.g. aphids, leafhoppers, whiteflies) are involved in the transmission of viral and  
29 bacterial infections. In spite of the diversity of species involved, the epidemiology of vector-borne  
30 diseases can be captured by relatively simple mathematical models describing the pathogen life-cycle  
31 across the main host (e.g. a vertebrate, a plant) and the vector (usually an insect). These  
32 epidemiological models clarified the impact of several life-history traits of the vector species for  
33 pathogen transmission and pointed out that traits acting on the biting behavior of the vector have a  
34 dramatic impact on disease dynamics [1]–[4]. But understanding the evolution of this biting behavior  
35 depends on who is controlling this behavior. Indeed, many pathogens are able to manipulate  
36 different behavioral traits of their vectors [5]–[7]. Interestingly, the ability of the pathogen to pull the  
37 strings of its vector may yield a conflict over the evolution of these traits. For instance, the biting rate  
38 maximizing pathogen fitness may be very different from the one maximizing vector fitness [8], [9].  
39 The resolution of this conflict has been studied in several different vector-borne diseases [5]–[7],  
40 [10]–[12].

41 Another important but often overlooked component of transmission involves host choice behavior of  
42 the vector. Several experimental studies have demonstrated that some vector species have biased  
43 preferences for infected [13]–[16] or uninfected hosts [17]–[19]. Epidemiological models show that  
44 vector preference for infected hosts can boost transmission during the early stage of the epidemic  
45 [20]–[26]. This suggests that attraction towards infected hosts may result, at least in part, from a  
46 manipulation of the vector by the pathogen. Yet, extreme preference for infected (or uninfected)  
47 hosts can also limit or even stop pathogen transmission. For instance, if the vectors bite only infected  
48 hosts they can never transmit the disease to uninfected hosts. Besides, recent empirical studies in  
49 plant pathogens indicate that the host choice behavior may be conditional on the infection status of  
50 the vector itself. In particular, uninfected vectors have been found to be attracted towards infected  
51 plants but, after being infected, they are attracted towards uninfected plants [27], [27]–[30]. Roosien  
52 et al [26] analysed the consequences of these behavioral shifts and demonstrated its dramatic  
53 impact for the epidemiology of plant pathogens. Such a conditional modification of vector behavior  
54 seems very adaptive for pathogen transmission but this hypothesis remains to be investigated  
55 theoretically.

56 Here I develop a theoretical framework to explore the consequences of vector host choice behavior  
57 on the epidemiology and evolution of vector-borne diseases. First, I develop a general  
58 epidemiological model to study the impact of the behavior of both infected and uninfected vectors  
59 on the persistence of the disease. Second, I use this epidemiological model to study the evolution of  
60 vector behavior. Scenarios with or without manipulation are contrasted to discuss the adaptive  
61 nature of these modifications of host preference for the vector or for the pathogen. Third, I review  
62 experimental studies that have examined host choice behavior in arthropod vectors. In particular, I  
63 focus on the handful of studies that have monitored the behavior of both infected and uninfected  
64 vectors. The diversity of vector behaviors in animal and plant vector-borne diseases is discussed in  
65 the light of this theoretical model.

## 66 2. The epidemiological model

67 Three organisms are interacting in this vector-borne disease model: the host, the vector (usually an  
68 insect) and the pathogen (e.g. virus, bacteria, protozoa). The host can either be infected (state  $I$ ) or  
69 uninfected (state  $S$ ) and, similarly, the vector can either be infected (state  $V_I$ ) or uninfected (state  
70  $V_S$ ). The following set of differential equations governs the dynamics of the densities of these  
71 different types of individuals (see table 1 for a summary of the main parameters of this model):

$$\begin{aligned} \dot{V}_S &= \lambda_S + \lambda_I - V_S b \frac{a_I I}{(1 + \tau(a_S S + a_I I))} - \delta_{V_S} V_S \\ \dot{V}_I &= V_S b \frac{a_I I}{(1 + \tau(a_S S + a_I I))} - \delta_{V_I} V_I \\ \dot{I} &= V_I \beta \frac{\alpha_S S}{(1 + \tau(\alpha_S S + \alpha_I I))} - dI \end{aligned} \quad (1)$$

72 where  $\lambda_S = V_S f_S (1 - \kappa N_V)$  and  $\lambda_I = V_I f_I (1 - \kappa N_V)$  refer to the density-dependent fecundity of  
73 uninfected and infected vectors, respectively. The parameter  $\kappa$  measures the intensity of density  
74 dependence while  $f_S$  and  $f_I$  measure the per capita fecundity of uninfected and infected vectors,  
75 respectively. The density of the whole population of the vector,  $N_V = V_S + V_I$ , is allowed to vary with  
76 the dynamics of both uninfected and infected vectors. The first phase of the pathogen life cycle is the  
77 infection of the vector after feeding on an infected host. The parameter  $b$  is the probability that the  
78 vector gets infected after biting an infected host. The behavior of the uninfected vectors is governed  
79 by the parameters  $a_S$  and  $a_I$  which refer to the searching efficiency of uninfected and infected hosts,  
80 respectively. The parameter  $\tau$  is the handling time of the host by the vector and includes the time  
81 taken to bite after landing on the host but also the time taken to digest before an attempt to bite a  
82 new host. When the handling time is very small the number of infected bites varies linearly with the  
83 number of susceptible hosts. When this handling time is large, it is the frequency of uninfected hosts  
84 that governs the epidemiological dynamics [21], [31]. The derivation of this Holling type II response is  
85 detailed in the appendix 1. The pathogen is allowed to affect vector survival with specific mortality  
86 rates for uninfected and infected vectors ( $\delta_{V_S}$  and  $\delta_{V_I}$  respectively).

87 The second phase of the pathogen life cycle is the infection of the host by infected vectors. For the  
88 sake of simplicity I assume that the total density of hosts,  $N = S + I$ , is a constant. This means that  
89 whenever a host dies (this occurs at a constant rate  $d$ ) it is immediately replaced by a new  
90 susceptible host. The parameter  $\beta$  is the probability that the host gets infected after being bitten by  
91 an infected vector. The behavior of the infected vectors is governed by the parameters  $\alpha_S$  and  $\alpha_I$   
92 which refer to the searching efficiency of uninfected and infected hosts, respectively.

93 To determine the ability of a pathogen to invade a disease-free environment I derive the pathogen's  
94 basic reproduction ratio  $R_0$  (see appendix 2):

$$R_0 = \sqrt{\frac{b\beta N N_V}{d\delta_{V_I}} \frac{\alpha_S}{1 + \tau\alpha_S N} \frac{a_I}{1 + \tau a_S N}} \quad (2)$$

95 where  $N_V = (f_S - \delta_{V_S})/\kappa f_S$  is the equilibrium density of the vector when the pathogen is absent.  
96 The pathogen can invade this disease-free equilibrium when  $R_0 > 1$ . Higher densities of both hosts

97 and vector are always increasing  $R_0$  but the behavior of both uninfected and infected vectors can  
98 also affect the basic reproduction ratio of the pathogen. The preference of uninfected vectors for  
99 infected hosts (large  $a_I$  and low  $a_S$ ) and the attraction of infected vectors towards susceptible hosts  
100 (large  $\alpha_S$ ) increase  $R_0$ . Note, however, that when  $\tau$  or  $N$  get very large the basic reproduction ratio  
101 depends only on the behavior of uninfected vectors. Under the assumption that the sums of  
102 searching efficiencies  $a = a_S + a_I$  and  $\alpha = \alpha_S + \alpha_I$  are fixed in uninfected and infected vectors,  
103 respectively, one can focus on the effects of the preference between infected and uninfected hosts.  
104 More specifically, I introduce the parameters  $p = a_I/(a_S + a_I)$  and  $\pi = \alpha_I/(\alpha_S + \alpha_I)$  that control  
105 the preference towards infected hosts in uninfected and infected vectors, respectively (Table 1).  
106 Figure 1A shows that  $R_0$  is maximized when uninfected vectors prefer biting infected hosts and when  
107 infected vectors prefer biting uninfected hosts. The figure also illustrates that extreme choice  
108 strategies can lead to parasite extinction (i.e.  $R_0 < 1$ ).

109 After pathogen invasion the system reaches an endemic equilibrium where the host, the vector and  
110 the pathogen can coexist (the notation  $\bar{x}$  is used to refer to the equilibrium density of the variable  $x$   
111 at this endemic equilibrium). These equilibrium densities depend on the behavior of the vectors as  
112 well as all the other parameters of the model. I failed to find simple analytic expressions for those  
113 densities but they can be readily obtained numerically using (1).

114 Note that the per capita fecundities  $f_S$  and  $f_I$  were assumed to be fixed quantities in figure 1A. The  
115 fecundity of many vector species, however, is likely to be limited by the availability and/or the quality  
116 of different types of hosts. Consequently, the fecundity of both infected and uninfected vectors are  
117 also going to depend on vector behavior:

$$\begin{aligned} f_S &= F_S \frac{a_S \bar{S} + a_I \phi \bar{I}}{1 + \tau(a_S \bar{S} + a_I \bar{I})} \\ f_I &= F_I \frac{\alpha_S \bar{S} + \alpha_I \phi \bar{I}}{1 + \tau(\alpha_S \bar{S} + \alpha_I \bar{I})} \end{aligned} \quad (3)$$

118 where  $F_S$  and  $F_I$  are the maximal fecundities of uninfected and infected vectors, respectively. The  
119 parameter  $\phi$  measures the intrinsic quality of the infected host relative to the uninfected host. For  
120 instance,  $\phi < 1$  indicates that infected hosts may provide less nutrients than healthy ones (e.g. in the  
121 case of malaria because of anaemia). The influence of vector behavior on vector fecundity can lead  
122 to complex epidemiological dynamics. For instance, the dynamical system may exhibit backward  
123 bifurcation at  $R_0 = 1$ . In other words, depending on the initial condition, the pathogen may either go  
124 extinct or reach an endemic equilibrium when  $R_0 < 1$ . In particular, this occurs when preference of  
125 uninfected vectors towards infected hosts becomes very pronounced (figure 1B). In the following, for  
126 the sake of simplicity, I will focus on situations where  $R_0 > 1$ .

### 127 3. Evolution

128 In the following I study the long-term evolutionary dynamics of the above dynamical system. Using  
129 the classical formalism of Adaptive Dynamics I assume mutation rate to be low which allows  
130 decoupling evolutionary and epidemiological dynamics [32]–[35]. In other words, I study the  
131 evolution of vector behavior (i.e. searching efficiency, host choice preference) through the derivation  
132 of the invasion of rare mutants (the subscript  $m$  refers to the mutant) in a resident system at  
133 equilibrium. First I analyze the evolution of vector behavior when this behavior is governed by the

134 vector itself. In a second step I examine a situation where vector behavior is (at least partly)  
135 manipulated by the pathogen and evolution takes place in the pathogen population.

### 136 **3.1 Vector evolution**

137 The model can first be used to study the evolution of vector behavior in the absence of the pathogen.  
138 In this case all the vectors are uninfected but they can adopt different searching efficiency strategies.  
139 Higher searching efficiency allows the vector to exploit more hosts and thus to produce more  
140 offspring but, on the other hand, searching for hosts may be costly because more energy is allocated  
141 into flying. I analyze the evolution of searching efficiency in appendix 3 and I show that the  
142 evolutionary stable searching efficiency decreases with the host population size,  $N$ , the handling  
143 time,  $\tau$ , or the fecundity cost associated with higher allocation to searching efficiency.

144 When the pathogen is present, the invasion of the mutant vector involves two compartments since  
145 the vector can either be infected or not. The analysis of the invasion of a mutant vector can be  
146 analyzed using the per-generation invasion number [36] (appendix 3):

$$R_{Vm} = \frac{f_{Sm}\delta_{V_I} + f_{Im}T_{V_{Sm} \rightarrow V_{Im}}}{\delta_{V_I}(T_{V_{Sm} \rightarrow V_{Im}} + \delta_{V_S})} (1 - \kappa N_V) \quad (4)$$

147 where  $T_{V_{Sm} \rightarrow V_{Im}} = b \frac{a_{Im}\bar{I}}{1 + \tau(a_{Sm}\bar{S} + a_{Im}\bar{I})}$ .

148 One could use the above invasion condition to study the evolution of searching efficiency but I want  
149 to focus on the preference for uninfected or infected hosts. I will thus assume that the searching  
150 efficiencies  $a = a_S + a_I$  and  $\alpha = \alpha_S + \alpha_I$  of uninfected and infected vectors are fixed and I will focus  
151 only on the evolution of the preference between infected and uninfected hosts. More specifically, I  
152 will study the evolution of parameters  $p$  and  $\pi$  that control the preference towards infected hosts in  
153 uninfected and infected vectors, respectively (Table 1).

154 The derivation of evolutionarily stable strategies can be obtained by maximizing  $R_{Vm}$  when the  
155 endemic equilibrium (i.e.  $\bar{V}_S$ ,  $\bar{V}_I$ ,  $\bar{S}$  and  $\bar{I}$ ) is set by the resident strategy (i.e.  $p$  and  $\pi$ ). Factors  
156 governing the direction of selection on vector behavior are detailed in appendix 3. In short, the  
157 model allows taking into account multiple evolutionary forces: (i) the cost of looking for a rare host,  
158 (ii) the cost of feeding on infected hosts, (iii) the potential fitness costs associated with the reduction  
159 of the fecundity and/or the survival of infected vectors. In other words, vector evolution is driven by  
160 time-limitation (risk of dying before reproducing) and/or egg-limitation (risk of producing a lower  
161 number of eggs) as in classical models of life-history evolution of parasitoids [37]. In malaria, for  
162 instance, the impact of the infection on vector survival is reduced but it is often associated with a  
163 reduced fecundity [38]–[40]. These fitness costs are expected to select vectors that avoid biting  
164 infected hosts. But, if the prevalence of infected hosts is very high the opposite may be predicted  
165 because the vector cannot afford to lose too much time looking for rare uninfected hosts. For  
166 instance figure 2 shows the evolutionary stable strategy of the vector when it is unable to adopt  
167 conditional strategies (i.e.  $p = \pi$ ). For a broad range of parameter values the vector prefers to bite  
168 uninfected hosts (figure 3A) but when the prevalence in the infection is very high in the host  
169 population, the vector may evolve a preference towards infected hosts.

170 Note, that our analysis yields extreme preference strategies that may ultimately lead the pathogen  
171 population to extinction (figure 1). This is because the current model assumes that any preference

172 strategy can evolve. Preference, however, requires an ability to discriminate between different types  
173 of hosts. In most biological systems this ability is likely to be imperfect or to carry fitness costs. The  
174 above model can be readily modified to account for an intrinsic cost associated with strong  
175 preference strategies but this would obscure the qualitative understanding of the evolutionary  
176 analysis.

### 177 **3.2 Pathogen evolution**

178 In the above section the vector was allowed to evolve different host preference strategies. But what  
179 if these preferences are governed (at least partly) by the pathogen? To answer this question I focus  
180 on the dynamics of a mutant pathogen in a resident pathogen population. Using a generalization of  
181 classical superinfection models [41], [42] it is assumed that when a vector infected with strain  $i$  bites  
182 a host infected with strain  $j$  the vector has a probability  $\sigma_V$  to lose the strain  $i$  and to become  
183 infected with strain  $j$ , while the host has a probability  $\sigma_H$  to lose the strain  $j$  and become infected  
184 with strain  $i$ . Although this is a very crude approximation of the within-host competition taking place  
185 between different pathogens it allows to account for multiple infections in the vector and in the host  
186 (e.g. in malaria [43], [44]). The ability of the mutant to outcompete the resident pathogen can be  
187 studied using the per-generation invasion number of the mutant (see appendix 4):

$$R_{Pm} = \sqrt{\frac{b\beta \left( \bar{V}_S T_{V_S \rightarrow V_{Im}} + \sigma_V \bar{V}_I T_{V_I \rightarrow V_{Im}} \right) \left( \bar{S} T_{S \rightarrow I_m} + \sigma_H \bar{I} T_{I \rightarrow I_m} \right)}{\left( \delta_{V_I} + \sigma_V b \bar{I} T_{V_{Im} \rightarrow V_I} \right) \left( d + \sigma_H \beta \bar{V}_I T_{I_m \rightarrow I} \right)}} \quad (5)$$

188 where the notation  $T_{X \rightarrow Y}$  refers to the transition between the states  $X$  and  $Y$ . Importantly, these  
189 transitions depend critically on the way the pathogen acts on the behaviour of the vectors. In the  
190 following I will consider three different scenarios.

#### 191 **Pathogen manipulates vectors from within infected hosts:**

192 The pathogen may act on vector behaviour through a manipulation of the attractiveness of the  
193 infected host. For example, this manipulation could act through the modification of the volatiles  
194 emitted by the infected hosts. In this scenario the behaviour of infected and uninfected vectors are  
195 undistinguishable (i.e.  $p = \pi$ ) because both types of vectors are attracted by the volatiles released by  
196 infected hosts (figure 3B). In this case the pathogen evolves a manipulation strategy that attracts the  
197 vector towards infected hosts. In other words selection on the pathogen is driven by the necessity to  
198 attract uninfected vectors even if it also attracts infected vectors. Superinfection in the vector,  $\sigma_V$ ,  
199 enhances this trend because even already infected vectors can transmit the mutant pathogen  
200 currently in the infected host. In contrast, superinfection in the host,  $\sigma_H$ , decreases the magnitude of  
201 selection because the mutant currently in the host may be ousted by another strain introduced by  
202 infected vectors.

#### 203 **Pathogen manipulates only infected vectors:**

204 Next, I assume that infected vectors are manipulated by the pathogen from within the infected  
205 vector. In the absence of host superinfection the pathogen is always evolving manipulation strategies  
206 leading higher vector preference towards uninfected hosts. Superinfection in the vector,  $\sigma_V$ ,  
207 enhances this trend because the mutant pathogen currently in the vector may be ousted by another  
208 pathogen strain if it bites an already infected host. Superinfection in the host, however, may

209 counteract this trend (and may even select preference for infected hosts) because the mutant  
210 currently in the vector may outcompete another pathogen strain in an already infected host.  
211 Biologically relevant parameter values (i.e. low probability of superinfection, intermediate  
212 prevalence) yields preference for uninfected hosts (figure 3C). The behavior of uninfected vectors is  
213 driven by selection acting on the vector which yields uninfected vectors to avoid infected hosts. In  
214 other words, I recover the prediction obtained when the vector controls its own behavior (compare  
215 figure 3A and 3C).

#### 216 **Pathogen manipulates independently the preference of infected and uninfected vectors:**

217 Finally I consider a situation where manipulation is conditional because it can act both from within  
218 infected vectors and from within infected hosts. I only consider the case where the manipulation of  
219 infected vectors is fully governed by the pathogen in the vector and the pathogen in the infected  
220 host can only affect the behaviour of uninfected vectors. In this case selection favors very different  
221 conditional strategies in infected and uninfected vectors. The pathogen manipulates uninfected  
222 vectors to bite infected hosts and it manipulates infected vectors to bite uninfected hosts and to  
223 avoid infected hosts (figure 3D).

224 In conclusion the model clearly shows that different assumptions regarding the control of vector  
225 behaviour have major consequences on the evolutionary and coevolutionary outcome (figure 3). In  
226 particular, I see that if the vector is fully controlling its behaviour it should generally avoid feeding on  
227 infected hosts. When this preference is at least partly manipulated by the pathogen three different  
228 evolutionary outcomes are possible depending on the mechanisms of the manipulation. These  
229 different evolutionary outcomes reveal the existence of conflicts between the vector and the  
230 pathogen over the control of vector behaviour. But they also reveal conflicts between the pathogen  
231 in the host (who is trying to attract uninfected vectors) and the pathogen in the vector (who is trying  
232 to get access to uninfected hosts).

## 233 **4. Experimental studies of host choice behavior**

234 It is particularly interesting to contrast the above theoretical predictions with available information  
235 on vector preference in different host-parasite systems. Most of the experimental and empirical  
236 work investigating the relative preference for infected or uninfected hosts focused only on host-  
237 choice behavior of uninfected vectors. I review this work below before discussing the more limited  
238 number of studies that monitored the host-choice behavior of both infected and uninfected vectors  
239 (figure 4 and Table S1).

### 240 **4.1 Behavior of uninfected vectors**

241 First, there is evidence that some vector species have evolved the ability to discriminate and avoid  
242 infected individuals. For instance, sharpshooter leafhoppers, a vector of the generalist plant  
243 pathogen *Xylella fastidiosa*, are more attracted towards healthy grapevines than symptomatic ones  
244 [19]. Similarly, chickens infected with *Plasmodium gallinaceum* have been found to be less attractive  
245 to the mosquito vector *Aedes aegypti* [17]. This observed preference for uninfected hosts is likely to  
246 be an adaptation of the vector who is trying to avoid low quality hosts (figure 3A). In the Anther-smut  
247 disease caused by *Ustilago violacea* the transmission of the spores relies on pollinator visits. Several  
248 studies report that insect vectors have the ability to avoid infected flowers [18], [45]. This may result

249 from an adaptation of the vector because infected flowers do not produce any pollen ( $\phi < 1$ ). But  
250 the fact that infected plants are known to bloom earlier and to produce more flowers may attract  
251 pollinators early in the season which is likely to result from an adaptation of the pathogen to  
252 maximize its transmission to healthy plants later on in the season [45].

253 Second, several studies found evidence of pathogen manipulation where infected hosts tend to  
254 attract uninfected vectors. For instance, hamsters infected with *Leishmania infantum* are more  
255 attracted to female sandflies [46]. Humans infected with *Plasmodium falciparum* and mice infected  
256 with *Plasmodium chabaudi* are more attractive to their respective mosquito vectors [14], [47].  
257 Phytoplasma are bacterial plant pathogens that are known to convert infected plants into more  
258 attractive hosts for their leafhopper vectors [48]. The causative agent of mummy berry disease of  
259 blueberry is the fungal pathogen *Monilinia vacciniae-corymbosi* which induces the production of  
260 pseudoflowers and mimicry of floral volatiles that attract insect vectors towards infected plants [49].

## 261 **4.2 Behaviour of infected and uninfected vectors**

262 Most of the work on conditional preference in vectors has been carried out in plant pathosystems.  
263 One of the first studies testing for such conditional preference has been done with Barley yellow  
264 dwarf virus (BYDV). Although the noninfected aphid *Rhopalosiphum padi* prefers to feed on infected  
265 wheat plants, the acquisition of the virus dramatically alters the behavior of the infected vector that  
266 prefers noninfected plants [27]. A similar reversal of feeding preference has been found in aphids  
267 infected by Potato leafroll virus (PLRV) [50]. This preference is mediated by virus-induced changes of  
268 potato plants that emit volatile blends enriched in monoterpenes, aldehydes and sesquiterpenes  
269 [50]. The Tomato yellow leaf curl virus (TYLCV) can also alter the host preference of its whitefly  
270 vector in the same way but, interestingly, this switch is modulated by the genotype of the vector, the  
271 genotype of the host and the timing of the infection [51], [52]. In particular the conditional  
272 preference of the whitefly was prominent only 6 weeks after infection on susceptible genotypes of  
273 plants. The Tomato severe rugose virus (ToSRV) is another virus infecting tomatoes where  
274 viruliferous (i.e. infectious) whiteflies are attracted towards volatiles emitted by uninfected plants,  
275 while non-viruliferous whiteflies do not show any preference between volatiles emitted by infected  
276 or uninfected plants [53].

277 Bacterial pathogens have also been found to affect the behavior of insect vectors. For instance,  
278 *Candidatus liberibacter asiaticus* (Las) has been found to enhance attraction to both uninfected and  
279 infected psyllid vectors [54]. This differential preference appears to be mediated by pathogen-  
280 induced emission of methyl salicylate in infected plants. The fact that infected vectors also prefer  
281 infected plants is likely to result from the emission of a general signal that attracts all the aphids  
282 (uninfected or not infected vectors). Note, that the pathogen has evolved other ways to encounter  
283 uninfected plants. First, aphids landing on infected plants are rapidly driven away from these poor  
284 quality hosts (lower palatability). Second, infected aphids have been found to increase its propensity  
285 to disperse (i.e. higher  $\alpha$  in our model) which may also allow the pathogen to settle in new  
286 uninfected plant populations. The bacterial pathogen *Erwinia tracheiphilia* [55] was also found to  
287 alter the foliar and floral volatile emission of its wild gourd host in ways that attract the beetle  
288 vectors towards infected leaves and uninfected flowers. The beetles may thus acquire *E. tracheiphilia*  
289 from infected leaves and transmit the pathogen to a new plant because cucumber beetle via  
290 attraction of their uninfected flowers. This differential effect on leaves and flowers may be yet



291 another way to promote pathogen transmission between infected and healthy plants even though  
292 infection of the beetle does not seem to affect its preference.

293 All the above examples refer to plant pathogens that reside for extended periods in their vectors.  
294 These persistently transmitted pathogens (PTP) have therefore more opportunities to act on the  
295 preference of their insect vectors. In contrast, some plant pathogens are non-persistent in their  
296 vectors (NPTP) and are expected to have lower abilities to act on vector behavior [29]. For instance  
297 the *Cucumber mosaic virus* (CMV) bind to specific regions of the mouthparts of the vector and are  
298 acquired and inoculated during brief tastes of outer plant cells. CMV has been shown to increase the  
299 volatile emissions in infected plants and to attract aphid vectors [29]. But CMV also alters nutrient  
300 cues of infected plants and this reduction of palatability encourages aphids to seek new and possibly  
301 uninfected plants. This pathogen manipulation is likely to enhance pathogen transmission but the  
302 conditional change of vector preference is driven by the poor quality of the infected host which is  
303 perceived by the vector after landing and not by a direct effect of the pathogen in the individual  
304 vector. The Tomato chlorosis virus (ToCV) is semi-persistent but does not circulate in its whitefly  
305 vector and seems to induce maladaptive modifications of its vector. Non-viruleferous whiteflies  
306 prefer the volatiles emitted by uninfected plants but viruleferous vectors do not exhibit any  
307 preference [53].

308 As far as I know a very limited number of studies have been done on the conditional behavior of  
309 infected and uninfected vectors of pathogens of animals. Unlike earlier results obtained with *P.*  
310 *gallinaceum* [17], uninfected *Culex pipiens* mosquitoes are attracted by passerine birds infected with  
311 *Plasmodium relictum* [15]. In a subsequent study Cornet et al. [56] showed that both infected and  
312 uninfected *C. pipiens* mosquitoes are attracted towards infected birds. This result suggests that the  
313 manipulation of host-choice behavior by *Plasmodium* acts on the quantity and/or the quality of  
314 volatiles emitted by infected birds [47] and that both infected and uninfected mosquitoes are  
315 attracted by the scent of this infection. Further studies are required to better characterize the  
316 underlying mechanism of this attraction in avian malaria but also in malaria parasites of other  
317 vertebrates including human malaria [57].

## 318 5. Discussion

319 The epidemiology of vector borne disease is very sensitive to the host-choice behavior of the  
320 arthropod vector. I developed a general model of vector borne transmission taking into account key  
321 features of the ecology of a broad range of different pathosystems. Interestingly, this model allows  
322 to escape the classical dichotomy between density and frequency dependent models [31] and may  
323 help provide a more realistic description of the transmission process of vector borne diseases. This  
324 model shows that extreme choice strategies can have dramatic consequences on the epidemiology  
325 of the disease and can even lead to pathogen eradication. However, when the uninfected vectors are  
326 more attracted towards infected hosts the dynamical system may exhibit backward bifurcation at  
327  $R_0 = 1$ . In other words, a stable endemic equilibrium may exist even if  $R_0 < 1$ . This result implies  
328 that vector choice may prevent the eradication of pathogens even if human interventions managed  
329 to reduce  $R_0$  below its critical level. Similar bistability has been observed in models of malaria  
330 transmission [58], [59] but here I show that the behavior of uninfected mosquitoes is a key driver of  
331 this dynamic. Further work is required to better identify conditions promoting this epidemiological  
332 bistability.

333 The evolutionary analysis of this model reveals complex conflicts between the vector and the  
334 pathogen over host-choice behaviour. Under some scenarios, the evolutionary interests of the vector  
335 and the pathogen are aligned which leads to a unique evolutionary outcome. In particular, when the  
336 pathogen is only able to manipulate the behaviour of infected vectors, both the vector and the  
337 pathogen are generally evolving a preference towards uninfected hosts (figure 3A and 3C). In this  
338 situation it is impossible to determine who is controlling the evolution of vector behaviour from  
339 observed preference patterns.

340 But pathogen evolution and vector evolution can yield qualitatively very different strategies under  
341 other scenarios. This conflict emerges as soon as the parasite in the infected hosts is able to govern  
342 host-choice behaviour of the vector. In this case, pathogen selection favours manipulation strategies  
343 leading uninfected vectors to prefer infected hosts (figure 3B). Indeed, numerous empirical studies  
344 show that pathogens can modify the scent of infected hosts to attract vectors [29]. This manipulation  
345 often involves the elevation or exaggeration of existing cues used by vectors to locate hosts. As  
346 pointed out by Mauck et al. [60] the evolution of such a “supernormal stimulus” does not involve  
347 major qualitative differences between infected and uninfected hosts and it is thus very difficult for  
348 the vector to evolve avoidance strategies even if infected vectors suffer from major fitness costs.

349 Finally, when the pathogen is able to adopt a different strategy in the host or in the vector,  
350 conditional preference strategies can evolve. Indeed, the transmission of the pathogen is maximised  
351 when uninfected vectors are attracted towards infected hosts and when infected vectors are  
352 attracted towards uninfected hosts (figure 3D). Interestingly, only plant viruses with a persistent and  
353 circulative mode of vector transmission have been shown to evolve such conditional preference  
354 strategies (figure 4). This indicates that only pathogens that evolved a persistent and intimate  
355 relationship with their vector are able to induce conditional preference strategies. It would also be  
356 interesting to explore the dynamics of the manipulation of preference in infected but not yet  
357 infectious vectors. Note, however, that in spite of persistent infection in its mosquito vector,  
358 *Plasmodium* does not induce conditional preference strategies [56]. Further studies exploring the  
359 host-choice preference of both infected and uninfected vectors of other pathogens are required to  
360 confirm that only virus have the ability to evolve such complex conditional manipulation strategies.

361 An interesting extension of this work would be to analyse situations where multiple pathogens share  
362 the same host and/or the same vector. It is easy to imagine how these complex epidemiological  
363 scenarios could yield new evolutionary conflicts over the manipulation of vector behaviours [61]. In  
364 addition, many pathogens can infect multiple host species and the vector preference for different  
365 host species can also have massive epidemiological consequences [62]–[64]. Several recent studies  
366 indicate that preference for different host species is heritable and could thus evolve as a response to  
367 a change of the environment [65], [66]. The above theoretical framework could be used to  
368 understand and predict the evolution and the manipulation of this other important behavioural trait.

369 The predictive power of these evolutionary models hinges upon our knowledge of the constraints  
370 acting on these behavioural traits. To understand these constraints it is important to study the  
371 mechanisms underlying vector preference. Experimental studies on vector preference indicate that  
372 host-choice can be mediated by multiple cues like odour, colour and taste [29], [67], [68]. Some  
373 pathogens have been shown to modify vector behaviour through the modification of these cues [29],  
374 [13], [69]. But in most cases the underlying mechanisms driving these modifications of vector

375 behaviour remain elusive. A better understanding of these underlying mechanisms could also lead to  
376 the development of novel public-health strategies to control vector-borne diseases [70]–[73]. The  
377 above theoretical analysis provides a framework to understand the evolution and the manipulation  
378 of key behavioural traits of vectors (e.g. host choice, biting rate) as well as a guide to structure the  
379 exploration of the mechanistic constraints acting on this evolution in a broad range of vector-borne  
380 diseases.

381 **Acknowledgements:**

382 I am very grateful to Ana Rivero, Nicole Mideo and Samuel Alizon for comments on the manuscript.  
383 This research was funded by European Research Council starting grant 243054 “EVOLPID”.

384 **References:**

- 385 [1] R. Ross, "An Application of the Theory of Probabilities to the Study of a priori Pathometry. Part  
386 I," *Proc. R. Soc. Lond. Ser. Contain. Pap. Math. Phys. Character*, vol. 92, no. 638, pp. 204–230,  
387 1916.
- 388 [2] R. M. Anderson, R. M. May, and B. Anderson, *Infectious diseases of humans: dynamics and  
389 control*, vol. 28. Wiley Online Library, 1992.
- 390 [3] G. Macdonald, "The epidemiology and control of malaria.," *Epidemiol. Control Malar.*, 1957.
- 391 [4] N. T. Bailey and others, *The mathematical theory of infectious diseases and its applications*.  
392 Charles Griffin & Company Ltd, 5a Crendon Street, High Wycombe, Bucks HP13 6LE., 1975.
- 393 [5] J. Moore, *Parasites and the Behavior of Animals*. Oxford University Press, 2002.
- 394 [6] M. J. Lehane, *The Biology of Blood-Sucking in Insects*. Cambridge University Press, 2005.
- 395 [7] T. Lefèvre and F. Thomas, "Behind the scene, something else is pulling the strings: emphasizing  
396 parasitic manipulation in vector-borne diseases," *Infect. Genet. Evol. J. Mol. Epidemiol. Evol.*  
397 *Genet. Infect. Dis.*, vol. 8, no. 4, pp. 504–519, Jul. 2008.
- 398 [8] J. C. Koella, "An evolutionary view of the interactions between anopheline mosquitoes and  
399 malaria parasites," *Microbes Infect.*, vol. 1, no. 4, pp. 303–308, avril 1999.
- 400 [9] A. Schwartz and J. C. Koella, "Trade-offs, conflicts of interest and manipulation in Plasmodium–  
401 mosquito interactions," *Trends Parasitol.*, vol. 17, no. 4, pp. 189–194, avril 2001.
- 402 [10] C. A. Stafford, G. P. Walker, and D. E. Ullman, "Infection with a plant virus modifies vector  
403 feeding behavior," *Proc. Natl. Acad. Sci.*, vol. 108, no. 23, pp. 9350–9355, Jun. 2011.
- 404 [11] L. J. Cator, P. A. Lynch, A. F. Read, and M. B. Thomas, "Do malaria parasites manipulate  
405 mosquitoes?," *Trends Parasitol.*, vol. 28, no. 11, pp. 466–470, Nov. 2012.
- 406 [12] L. J. Cator *et al.*, "'Manipulation' without the parasite: altered feeding behaviour of mosquitoes  
407 is not dependent on infection with malaria parasites," *Proc R Soc B*, vol. 280, no. 1763, p.  
408 20130711, Jul. 2013.
- 409 [13] S. D. Eigenbrode, H. Ding, P. Shiel, and P. H. Berger, "Volatiles from potato plants infected with  
410 potato leafroll virus attract and arrest the virus vector, *Myzus persicae* (Homoptera:  
411 Aphididae)," *Proc. Biol. Sci.*, vol. 269, no. 1490, pp. 455–460, Mar. 2002.
- 412 [14] R. Lacroix, W. R. Mukabana, L. C. Gouagna, and J. C. Koella, "Malaria Infection Increases  
413 Attractiveness of Humans to Mosquitoes," *PLOS Biol.*, vol. 3, no. 9, p. e298, août 2005.
- 414 [15] S. Cornet, A. Nicot, A. Rivero, and S. Gandon, "Malaria infection increases bird attractiveness to  
415 uninfected mosquitoes," *Ecol. Lett.*, vol. 16, no. 3, pp. 323–329, Mar. 2013.
- 416 [16] A. M. MacLean *et al.*, "Phytoplasma Effector SAP54 Hijacks Plant Reproduction by Degrading  
417 MADS-box Proteins and Promotes Insect Colonization in a RAD23-Dependent Manner," *PLOS*  
418 *Biol.*, vol. 12, no. 4, p. e1001835, avr 2014.
- 419 [17] J. E. Freier and S. Friedman, "Effect of host infection with *Plasmodium gallinaceum* on the  
420 reproductive capacity of *Aedes aegypti*," *J. Invertebr. Pathol.*, vol. 28, no. 2, pp. 161–166, Sep.  
421 1976.
- 422 [18] S. M. Altizer, P. H. Thrall, and J. Antonovics, "Vector Behavior and the Transmission of Anther-  
423 Smut Infection in *Silene alba*," *Am. Midl. Nat.*, vol. 139, no. 1, pp. 147–163, 1998.
- 424 [19] M. P. Daugherty, A. Rashed, R. P. P. Almeida, and T. M. Perring, "Vector preference for hosts  
425 differing in infection status: sharpshooter movement and *Xylella fastidiosa* transmission," *Ecol.*  
426 *Entomol.*, vol. 36, no. 5, pp. 654–662, Oct. 2011.
- 427 [20] J. G. Kingsolver, "Mosquito Host Choice and the Epidemiology of Malaria," *Am. Nat.*, vol. 130,  
428 no. 6, pp. 811–827, décembre 1987.
- 429 [21] J. Antonovics, Y. Iwasa, and M. P. Hassell, "A Generalized Model of Parasitoid, Venereal, and  
430 Vector-Based Transmission Processes," *Am. Nat.*, vol. 145, no. 5, pp. 661–675, mai 1995.
- 431 [22] P. McElhany, L. A. Real, and A. G. Power, "Vector Preference and Disease Dynamics: A Study of  
432 Barley Yellow Dwarf Virus," *Ecology*, vol. 76, no. 2, pp. 444–457, Mar. 1995.
- 433 [23] G. R. Hosack, P. A. Rossignol, and P. van den Driessche, "The control of vector-borne disease  
434 epidemics," *J. Theor. Biol.*, vol. 255, no. 1, pp. 16–25, Nov. 2008.

- 435 [24] M. S. Sisterson, "Effects of insect-vector preference for healthy or infected plants on pathogen  
436 spread: insights from a model," *J. Econ. Entomol.*, vol. 101, no. 1, pp. 1–8, Feb. 2008.
- 437 [25] F. Chamchod and N. F. Britton, "Analysis of a vector-bias model on malaria transmission," *Bull.*  
438 *Math. Biol.*, vol. 73, no. 3, pp. 639–657, Mar. 2011.
- 439 [26] B. K. Roosien, R. Gomulkiewicz, L. L. Ingwell, N. A. Bosque-Pérez, D. Rajabaskar, and S. D.  
440 Eigenbrode, "Conditional vector preference aids the spread of plant pathogens: results from a  
441 model," *Environ. Entomol.*, vol. 42, no. 6, pp. 1299–1308, Dec. 2013.
- 442 [27] L. L. Ingwell, S. D. Eigenbrode, and N. A. Bosque-Pérez, "Plant viruses alter insect behavior to  
443 enhance their spread," *Sci. Rep.*, vol. 2, p. 578, Aug. 2012.
- 444 [28] Y. Fang *et al.*, "Tomato yellow leaf curl virus alters the host preferences of its vector Bemisia  
445 tabaci," *Sci. Rep.*, vol. 3, p. 2876, Oct. 2013.
- 446 [29] K. E. Mauck, C. M. De Moraes, and M. C. Mescher, "Effects of pathogens on sensory-mediated  
447 interactions between plants and insect vectors," *Curr. Opin. Plant Biol.*, vol. 32, pp. 53–61, Aug.  
448 2016.
- 449 [30] S. Blanc and Y. Michalakis, "Manipulation of hosts and vectors by plant viruses and impact of  
450 the environment," *Curr. Opin. Insect Sci.*, vol. 16, pp. 36–43, août 2016.
- 451 [31] H. McCallum, N. Barlow, and J. Hone, "How should pathogen transmission be modelled?,"  
452 *Trends Ecol. Evol.*, vol. 16, no. 6, pp. 295–300, juin 2001.
- 453 [32] J. A. Metz, R. M. Nisbet, and S. A. Geritz, "How should we define 'fitness' for general ecological  
454 scenarios?," *Trends Ecol. Evol.*, vol. 7, no. 6, pp. 198–202, Jun. 1992.
- 455 [33] S. a. H. Geritz, E. Kisdi, G. Mesze'NA, and J. a. J. Metz, "Evolutionarily singular strategies and the  
456 adaptive growth and branching of the evolutionary tree," *Evol. Ecol.*, vol. 12, no. 1, pp. 35–57,  
457 Jan. 1998.
- 458 [34] É. Kisdi and S. A. H. Geritz, "Adaptive dynamics: a framework to model evolution in the  
459 ecological theatre," *J. Math. Biol.*, vol. 61, no. 1, pp. 165–169, Jul. 2010.
- 460 [35] D. Waxman and S. Gavrillets, "20 questions on adaptive dynamics," *J. Evol. Biol.*, vol. 18, no. 5,  
461 pp. 1139–1154, Sep. 2005.
- 462 [36] A. Hurford, D. Cownden, and T. Day, "Next-generation tools for evolutionary invasion analyses,"  
463 *J. R. Soc. Interface*, vol. 7, no. 45, pp. 561–571, Apr. 2010.
- 464 [37] H. C. J. Godfray, *Parasitoids: Behavioral and Evolutionary Ecology*. Princeton University Press,  
465 1994.
- 466 [38] H. M. Ferguson and A. F. Read, "Why is the effect of malaria parasites on mosquito survival still  
467 unresolved?," *Trends Parasitol.*, vol. 18, no. 6, pp. 256–261, juin 2002.
- 468 [39] H. Hurd, "Manipulation of medically important insect vectors by their parasites," *Annu. Rev.*  
469 *Entomol.*, vol. 48, pp. 141–161, 2003.
- 470 [40] J. Vézilier, A. Nicot, S. Gandon, and A. Rivero, "Plasmodium infection decreases fecundity and  
471 increases survival of mosquitoes," *Proc. R. Soc. Lond. B Biol. Sci.*, vol. 279, no. 1744, pp. 4033–  
472 4041, Oct. 2012.
- 473 [41] M. A. Nowak and R. M. May, "Superinfection and the evolution of parasite virulence," *Proc.*  
474 *Biol. Sci.*, vol. 255, no. 1342, pp. 81–89, Jan. 1994.
- 475 [42] S. Gandon, V. A. Jansen, and M. van Baalen, "Host life history and the evolution of parasite  
476 virulence," *Evol. Int. J. Org. Evol.*, vol. 55, no. 5, pp. 1056–1062, May 2001.
- 477 [43] J. C. de Roode *et al.*, "Virulence and competitive ability in genetically diverse malaria  
478 infections," *Proc. Natl. Acad. Sci. U. S. A.*, vol. 102, no. 21, pp. 7624–7628, 2005.
- 479 [44] L. C. Pollitt, J. T. Bram, S. Blanford, M. J. Jones, and A. F. Read, "Existing Infection Facilitates  
480 Establishment and Density of Malaria Parasites in Their Mosquito Vector," *PLOS Pathog.*, vol.  
481 11, no. 7, p. e1005003, juil 2015.
- 482 [45] O. Jennersten, "Insect Dispersal of Fungal Disease: Effects of Ustilago Infection on Pollinator  
483 Attraction in *Viscaria vulgaris*," *Oikos*, vol. 51, no. 2, pp. 163–170, 1988.
- 484 [46] B. O'Shea, E. Rebollar-Tellez, R. D. Ward, J. G. C. Hamilton, D. El Naiem, and A. Polwart,  
485 "Enhanced sandfly attraction to Leishmania-infected hosts," *Trans. R. Soc. Trop. Med. Hyg.*, vol.  
486 96, no. 2, pp. 117–118, Mar. 2002.

- 487 [47] C. M. D. Moraes *et al.*, “Malaria-induced changes in host odors enhance mosquito attraction,”  
488 *Proc. Natl. Acad. Sci.*, vol. 111, no. 30, pp. 11079–11084, Jul. 2014.
- 489 [48] A. M. MacLean *et al.*, “Phytoplasma effector SAP54 hijacks plant reproduction by degrading  
490 MADS-box proteins and promotes insect colonization in a RAD23-dependent manner,” *PLoS*  
491 *Biol.*, vol. 12, no. 4, p. e1001835, Apr. 2014.
- 492 [49] S. H. McArt, T. D. Miles, C. Rodriguez-Saona, A. Schilder, L. S. Adler, and M. J. Grieshop, “Floral  
493 Scent Mimicry and Vector-Pathogen Associations in a Pseudoflower-Inducing Plant Pathogen  
494 System,” *PLOS ONE*, vol. 11, no. 11, p. e0165761, Nov. 2016.
- 495 [50] D. Rajabaskar, N. A. Bosque-Pérez, and S. D. Eigenbrode, “Preference by a virus vector for  
496 infected plants is reversed after virus acquisition,” *Virus Res.*, vol. 186, pp. 32–37, Jun. 2014.
- 497 [51] Y. Fang *et al.*, “Tomato yellow leaf curl virus alters the host preferences of its vector *Bemisia*  
498 *tabaci*,” *Sci. Rep.*, vol. 3, Oct. 2013.
- 499 [52] S. Legarrea, A. Barman, W. Marchant, S. Diffie, and R. Srinivasan, “Temporal Effects of a  
500 Begomovirus Infection and Host Plant Resistance on the Preference and Development of an  
501 Insect Vector, *Bemisia tabaci*, and Implications for Epidemics,” *PLOS ONE*, vol. 10, no. 11, p.  
502 e0142114, Nov. 2015.
- 503 [53] A. Fereres *et al.*, “Tomato Infection by Whitefly-Transmitted Circulative and Non-Circulative  
504 Viruses Induce Contrasting Changes in Plant Volatiles and Vector Behaviour,” *Viruses*, vol. 8, no.  
505 8, Aug. 2016.
- 506 [54] R. S. Mann *et al.*, “Induced Release of a Plant-Defense Volatile ‘Deceptively’ Attracts Insect  
507 Vectors to Plants Infected with a Bacterial Pathogen,” *PLOS Pathog.*, vol. 8, no. 3, p. e1002610,  
508 Mar. 2012.
- 509 [55] L. Shapiro, C. M. De Moraes, A. G. Stephenson, M. C. Mescher, and W. van der Putten,  
510 “Pathogen effects on vegetative and floral odours mediate vector attraction and host exposure  
511 in a complex pathosystem,” *Ecol. Lett.*, vol. 15, no. 12, pp. 1430–1438, Dec. 2012.
- 512 [56] S. Cornet, A. Nicot, A. Rivero, and S. Gandon, “Both infected and uninfected mosquitoes are  
513 attracted toward malaria infected birds,” *Malar. J.*, vol. 12, p. 179, 2013.
- 514 [57] S. N. Emami *et al.*, “A key malaria metabolite modulates vector blood seeking, feeding, and  
515 susceptibility to infection,” *Science*, p. eaah4563, Feb. 2017.
- 516 [58] N. Chitnis, J. M. Cushing, and J. M. Hyman, “Bifurcation analysis of a mathematical model for  
517 malaria transmission,” *SIAM J. Appl. Math.*, vol. 67, no. 1, pp. 24–45, 2006.
- 518 [59] B. Buonomo and C. Vargas-De-León, “Stability and bifurcation analysis of a vector-bias model of  
519 malaria transmission,” *Math. Biosci.*, vol. 242, no. 1, pp. 59–67, Mar. 2013.
- 520 [60] K. E. Mauck, C. M. D. Moraes, and M. C. Mescher, “Deceptive chemical signals induced by a  
521 plant virus attract insect vectors to inferior hosts,” *Proc. Natl. Acad. Sci.*, vol. 107, no. 8, pp.  
522 3600–3605, Feb. 2010.
- 523 [61] M. F. G. V. Peñaflor, K. E. Mauck, K. J. Alves, C. M. De Moraes, and M. C. Mescher, “Effects of  
524 single and mixed infections of Bean pod mottle virus and Soybean mosaic virus on host-plant  
525 chemistry and host–vector interactions,” *Funct. Ecol.*, vol. 30, no. 10, pp. 1648–1659, Oct. 2016.
- 526 [62] A. M. Kilpatrick, L. D. Kramer, M. J. Jones, P. P. Marra, and P. Daszak, “West Nile virus epidemics  
527 in North America are driven by shifts in mosquito feeding behavior,” *PLoS Biol.*, vol. 4, no. 4, p.  
528 e82, Apr. 2006.
- 529 [63] I. N. Lyimo and H. M. Ferguson, “Ecological and evolutionary determinants of host species  
530 choice in mosquito vectors,” *Trends Parasitol.*, vol. 25, no. 4, pp. 189–196, Apr. 2009.
- 531 [64] W. Takken and N. O. Verhulst, “Host preferences of blood-feeding mosquitoes,” *Annu. Rev.*  
532 *Entomol.*, vol. 58, pp. 433–453, 2013.
- 533 [65] C. S. McBride *et al.*, “Evolution of mosquito preference for humans linked to an odorant  
534 receptor,” *Nature*, vol. 515, no. 7526, pp. 222–227, Nov. 2014.
- 535 [66] B. J. Main *et al.*, “The Genetic Basis of Host Preference and Resting Behavior in the Major  
536 African Malaria Vector, *Anopheles arabiensis*,” *PLOS Genet.*, vol. 12, no. 9, p. e1006303, Sep.  
537 2016.

- 538 [67] S. Gutiérrez, Y. Michalakos, M. Van Munster, and S. Blanc, "Plant feeding by insect vectors can  
539 affect life cycle, population genetics and evolution of plant viruses," *Funct. Ecol.*, vol. 27, no. 3,  
540 pp. 610–622, juin 2013.
- 541 [68] R. G. Dietzgen, K. S. Mann, and K. N. Johnson, "Plant Virus-Insect Vector Interactions: Current  
542 and Potential Future Research Directions," *Viruses*, vol. 8, no. 11, Nov. 2016.
- 543 [69] S. N. Emami *et al.*, "A key malaria metabolite modulates vector blood seeking, feeding, and  
544 susceptibility to infection," *Science*, p. eaah4563, Feb. 2017.
- 545 [70] J. P. Grieco *et al.*, "A New Classification System for the Actions of IRS Chemicals Traditionally  
546 Used For Malaria Control," *PLOS ONE*, vol. 2, no. 8, p. e716, août 2007.
- 547 [71] N. L. Achee *et al.*, "Spatial repellents: from discovery and development to evidence-based  
548 validation," *Malar. J.*, vol. 11, p. 164, 2012.
- 549 [72] A. O. Busula, W. Takken, D. E. Loy, B. H. Hahn, W. R. Mukabana, and N. O. Verhulst, "Mosquito  
550 host preferences affect their response to synthetic and natural odour blends," *Malar. J.*, vol. 14,  
551 p. 133, 2015.
- 552 [73] P. A. Lynch and M. Boots, "Using evolution to generate sustainable malaria control with spatial  
553 repellents," *eLife*, vol. 5, p. e15416, Oct. 2016.
- 554
- 555

556 **Table1:** Definitions of the main parameters of the model.

| <b>Main parameters</b>                                                  | <b>Definitions</b>                                                                              |
|-------------------------------------------------------------------------|-------------------------------------------------------------------------------------------------|
| $N = S + I$                                                             | Host density (susceptible + infected).                                                          |
| $N_V = V_S + V_I$                                                       | Vector density (susceptible + infected).                                                        |
| $a_S, a_I$                                                              | Searching efficiency of uninfected vectors for uninfected and infected hosts.                   |
| $\alpha_S, \alpha_I$                                                    | Searching efficiency of infected vectors for uninfected and infected hosts.                     |
| $p = \frac{a_I}{a_S + a_I}, \pi = \frac{\alpha_I}{\alpha_S + \alpha_I}$ | Preference towards infected hosts in uninfected and infected vectors.                           |
| $b$                                                                     | Probability that an uninfected vector gets infected after biting an infected host.              |
| $\beta$                                                                 | Probability that an uninfected host gets infected after being bitten by an infected vector.     |
| $\tau$                                                                  | Handling time.                                                                                  |
| $\lambda_S = V_S f_S (1 - \kappa N_V)$                                  | Fecundity of uninfected vectors.                                                                |
| $\lambda_I = V_I f_I (1 - \kappa N_V)$                                  | Fecundity of infected vectors.                                                                  |
| $f_S, f_I$                                                              | Per capita fecundities of uninfected and infected vectors.                                      |
| $F_S, F_I$                                                              | Maximal fecundities of uninfected and infected vectors.                                         |
| $\kappa$                                                                | Intensity of density dependence on vector fecundity.                                            |
| $d$                                                                     | Mortality rate of infected host.                                                                |
| $\delta_{V_S}, \delta_{V_I}$                                            | Mortality rates of susceptible and infected vectors.                                            |
| $R_0$                                                                   | Basic reproduction ratio of the pathogen.                                                       |
| $R_{Vm}$                                                                | Per generation invasion ratio of a mutant vector.                                               |
| $R_{Pm}$                                                                | Per generation invasion ratio of a mutant pathogen.                                             |
| $c$                                                                     | Cost of searching efficiency on vector fecundity.                                               |
| $\phi$                                                                  | Quality (for the fecundity of the vector) of the infected host relative to the uninfected host. |
| $\sigma_H, \sigma_V$                                                    | Probability of superinfection of an infected host and an infected vector, respectively.         |

557



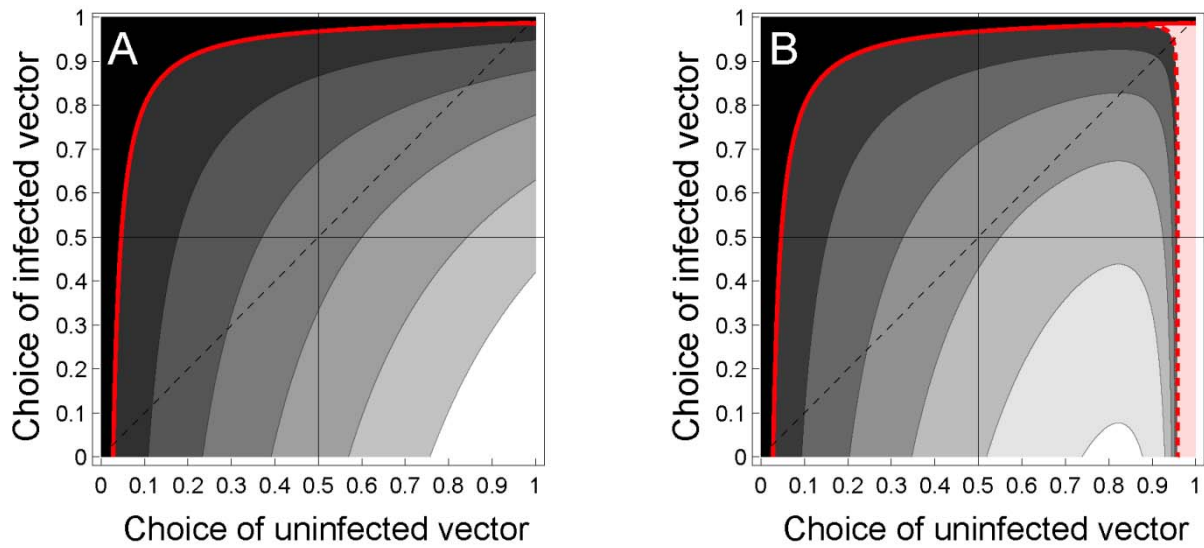

558 **Figure 1:** Effect of vector host choice on the basic reproduction ratio  $R_0$  of the pathogen given in  
 559 equation (2). The red line indicates the threshold value where  $R_0 = 1$  and the shades of gray indicate  
 560 different values of  $R_0$  from 1 to 6. In (A) the population size of the vector,  $N_V$ , before the  
 561 introduction of the pathogen does not depend on host choice behavior because vector fecundity is  
 562 assumed to be constant  $f_S = 10$ . In (B) the population size of the vector,  $N_V$ , depends on vector  
 563 behavior because fecundity is assumed to depend on host preference as indicated in equation (3)  
 564 with  $F_S = 10$ . Note that when uninfected vectors prefer infected hosts, the system exhibits a  
 565 backward bifurcation at  $R_0 = 1$  (dashed red line) and, depending on the initial conditions of the  
 566 system, the pathogen may either go extinct or reach an endemic equilibrium when  $R_0 < 1$  (light red  
 567 region). The full red line and the black area indicate the parameter region where the pathogen is  
 568 always driven to extinction. Other parameter values:  $N = 500$ ,  $\kappa = 0.01$ ,  $b = \beta = 1$ ,  $d = 0.05$ ,  
 569  $\delta_{V_S} = \delta_{V_I} = 1$ ,  $\tau = 0.1$ ,  $a = \alpha = 0.01$ .

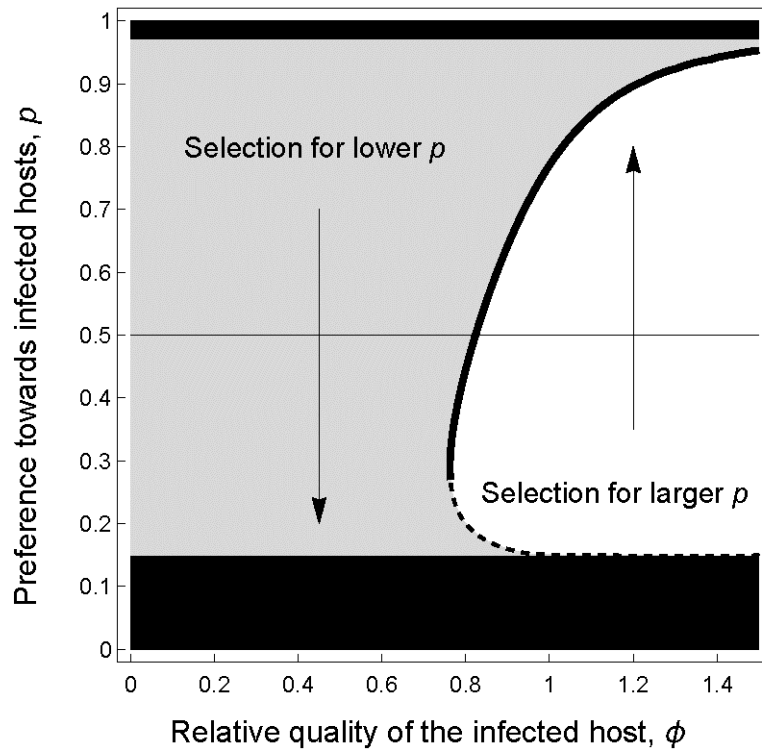

570

571 **Figure 2:** Effect of the relative quality of the infected host,  $\phi$ , on the evolution of unconditional host  
572 preference of the vector. The pathogen goes extinct when vector preference reaches extreme values  
573 (black region). When the relative quality of the infected host is low vectors evolve preference for  
574 uninfected hosts (gray region). But when the quality of infected host is relatively high vectors can  
575 evolve preference for infected hosts. The ultimate outcome may either be an intermediate  
576 preference strategy (bold black line) or extreme avoidance strategy towards infected hosts and,  
577 consequently, pathogen extinction. Other parameter values:  $N = 1000$ ,  $\kappa = 0.001$ ,  $b = \beta = 0.5$ ,  
578  $d = 0.1$ ,  $\delta_{V_S} = \delta_{V_I} = 1$ ,  $\tau = 0.5$ ,  $a = \alpha = 0.01$ ,  $F_S = F_I = 5$ .

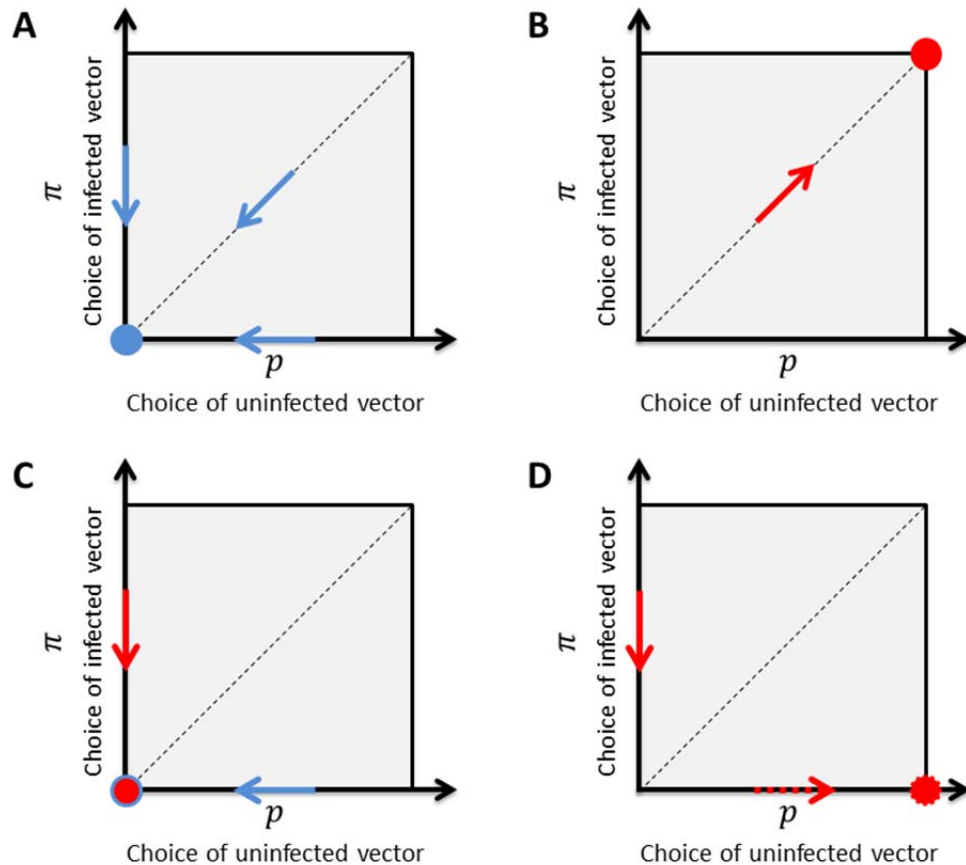

579  
580 **Figure 3:** Schematic representation of the evolution of host preference by uninfected and infected  
581 vectors under different scenarios. Blue arrows indicate the direction of evolution under vector  
582 control and red arrows indicate direction of evolution under pathogen control. In (A) host choice  
583 preference is only governed by the vector. In (B) host choice preference of both infected and  
584 uninfected vectors is governed by the pathogen in the infected host (i.e.  $p = \pi$ ). In (C) host choice  
585 preference of infected vectors is governed by the pathogen while host choice preference of  
586 uninfected vectors is governed by the vector. In (D) the dashed arrow indicates evolution driven by  
587 the pathogen in the infected hosts while the full arrow indicates evolution driven by the pathogen in  
588 the infected vector. These four different scenarios yield different ultimate evolutionary outcomes  
589 indicated by a large point in each panel. Note that the above panels summarize general evolutionary  
590 trends under biologically relevant parameter values but extreme parameter values may yield  
591 qualitatively different evolutionary predictions (see main text).

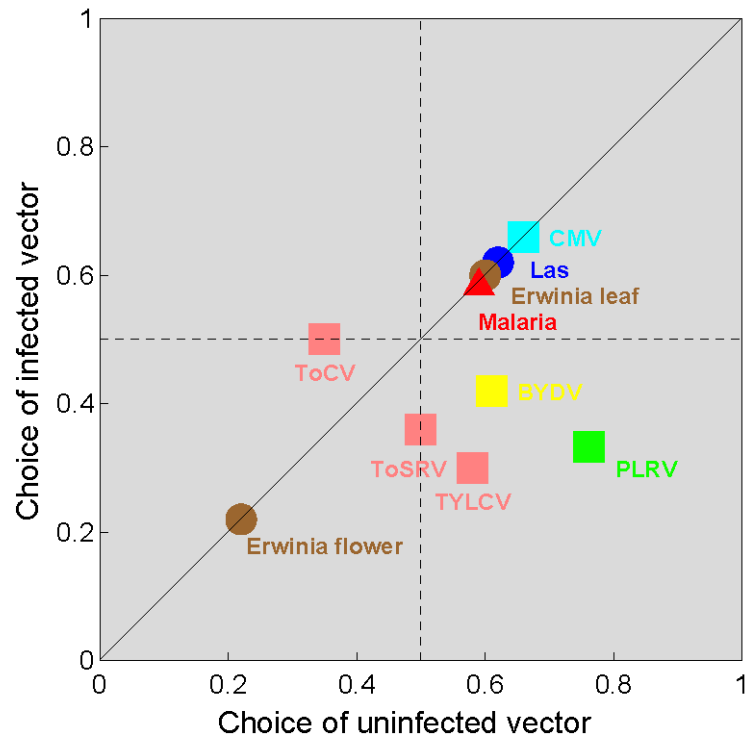

592

593 **Figure 4:** Host choice in uninfected and infected vectors of different pathogens: Tomato yellow leaf  
594 curl virus (TYLCV), Tomato severe rugose virus (ToSRV), Tomato chlorosis virus (ToCV), Potato leaf roll virus  
595 (PLRV), Cucumber mosaic virus (CMV), *Candidatus liberibacter asiaticus* (Las), *Erwinia tracheiphila* (wilt  
596 disease), *Plasmodium relictum* (avian malaria). A detailed presentation of the references used to make  
597 this figure is presented in Table S1. Different symbols are used to distinguish between viruses (circle),  
598 bacteria (square) and protozoan (triangle). The reference of the data used to plot this figure is  
599 detailed in Table S1.
